# Supplementary material for: Designing a new type of magnetic ionic liquid: a strategy to improve the magnetic susceptibility
Source: Royal Society of Chemistry journal article supplement (doi:10.1039/c9nj03464a), 2019-01-01
Supplement: c9nj03464a1.pdf [file c9nj03464a1.pdf]

## Electronic Supplementary Information

### **Designing A New Type of Magnetic Ionic Liquids: A Strategy to Improve Magnetic Susceptibility**

Kaige Wu and Xinghai Shen \*

Beijing National Laboratory for Molecular Sciences (BNLMS), Fundamental Science on Radiochemistry and Radiation Chemistry Laboratory, Center for Applied Physics and Technology, College of Chemistry and Molecular Engineering, Peking University, Beijing 100871, P. R. China

\*Corresponding Authors: [xshen@pku.edu.cn](mailto:xshen@pku.edu.cn)

## Experimental

### Materials

All chemicals were obtained commercially from China. N,N,N',N'-tetra(n-octyl)diglycolamide (TODGA, 98%) and 1,1,1,5,5,5-hexafluoroacetylacetone (99%) were purchased from Shanghai YuDuo-biological science & Technology and J & K Scientific, respectively. Terbium (III) chloride hexahydrate (99.99%), dysprosium (III) chloride hexahydrate (99.99%) and thulium (III) chloride hexahydrate (99.99%) were obtained from Shanghai Xianding Biological Science & Technology. Holmium (III) chloride hexahydrate (99.99%) and erbium (III) chloride hexahydrate (99.99%) were received from Shanghai Sun Chemical Technology. Ytterbium (III) chloride hexahydrate (99.99%) was purchased from Shanghai D&B Biological Science and Technology. Ammonium hydroxide, 1,2-dichloroethane, ethanol, acetonitrile and ethyl ether were of analytical grade. All solvents and reagents were used as received without any additional drying or purification. Ultra-pure water (18.2 MΩ cm) was used throughout the experiments.

### Instruments

ESI-MS was done on a Fourier transform ion cyclotron resonance mass spectrometer, Solarix XR (Bruker, Germany). EA were measured on an elemental analyzer, vario EL (Elementar Analysensysteme GmbH, Germany). IR spectra of MILs **1-6** were recorded on a Nicolet iS50 spectrometer (ThermoFisher). TGA were accomplished on a Q600 TGA-DSC-DTA (Q600 SDT, TA) under N<sub>2</sub> atmosphere with the temperature ranging from room temperature to 873 K at a heating rate of 10 K / min. DSC were carried out on a Q100 Differential Scanning Calorimeter (Q100DSC, TA). A cooling and heating ramp of 10 K / min was used within the temperature ranging from 203 to 303 K, and three scans were carried out for each sample. Luminescent Measurements were recorded on a lifetime and steady state spectrometer (FLS920, Edinburgh Instruments Ltd.). Magnetic Measurements were performed on a Quantum Design MPMS3 magnetometer. Temperature dependence of magnetization (M-T) was measured under an applied field of 10000 Oe in the temperature range of 2-300 K. Diamagnetic corrections were calculated from Pascal's constants (G. A. Bain and J. F. Berry, *J. Chem. Educ.*, 2008, **85**, 532-536) and applied to all data. Field dependence of magnetization (M-H) for [Dy(TODGA)<sub>3</sub>][Dy(hfa)<sub>4</sub>]<sub>3</sub> was measured at 2, 5 and 300 K in the magnetic field range -6 T to 6 T.

### Preparation of [Ln(TODGA)<sub>3</sub>][Ln(hfa)<sub>4</sub>]<sub>3</sub>

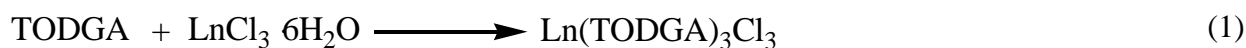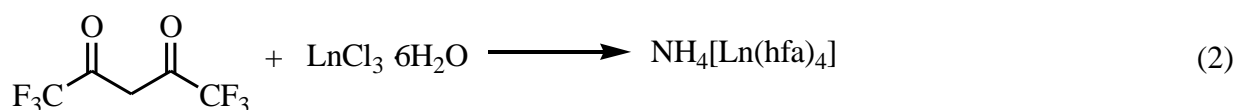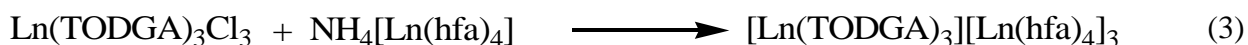

Synthesis of Ln(TODGA)<sub>3</sub>Cl<sub>3</sub> (Ln = Tb, Dy, Ho, Er, Tm, Yb). LnCl<sub>3</sub> · 6H<sub>2</sub>O (1 equiv.) was added to

a solution of TODGA (3 equiv.) in 1,2-dichloroethane. The reaction was stirred overnight at room temperature and then the solution was filtered to remove any insoluble compound. A viscous liquid was obtained upon slow evaporation of 1,2-dichloroethane. The compound was then dried overnight under high vacuum at 333 K.

Synthesis of  $\text{NH}_4[\text{Ln}(\text{hfa})_4]$  ( $\text{Ln} = \text{Tb, Dy, Ho, Er, Tm, Yb}$ ). The reaction of ammonium hexafluoroacetylacetonate ( $[\text{NH}_4][\text{hfa}]$ ) with various rare earth metal centers was referred to the literature (S. A. Pierson, O. Nacham, K. D. Clark, H. Nan, Y. Mudryk and J. L. Anderson, *New J. Chem.*, 2017, **41**, 5498-5505).

Synthesis of  $[\text{Ln}(\text{TODGA})_3][\text{Ln}(\text{hfa})_4]_3$  ( $\text{Ln} = \text{Tb, Dy, Ho, Er, Tm, Yb}$ ).  $\text{Ln}(\text{TODGA})_3\text{Cl}_3$  (1 equiv.) and  $\text{NH}_4[\text{Ln}(\text{hfa})_4]$  (3 equiv.) were dissolved in acetonitrile. The solution was allowed to stir at room temperature for 24 hours. The solvent was removed under reduced pressure and the crude product was redissolved in a certain volume of diethyl ether and washed several times with ultra-pure water until the aqueous fraction yielded no precipitate during a  $\text{AgNO}_3$  test. A viscous liquid was obtained upon slow evaporation of diethyl ether. The compound was then dried overnight under high vacuum at 333 K.

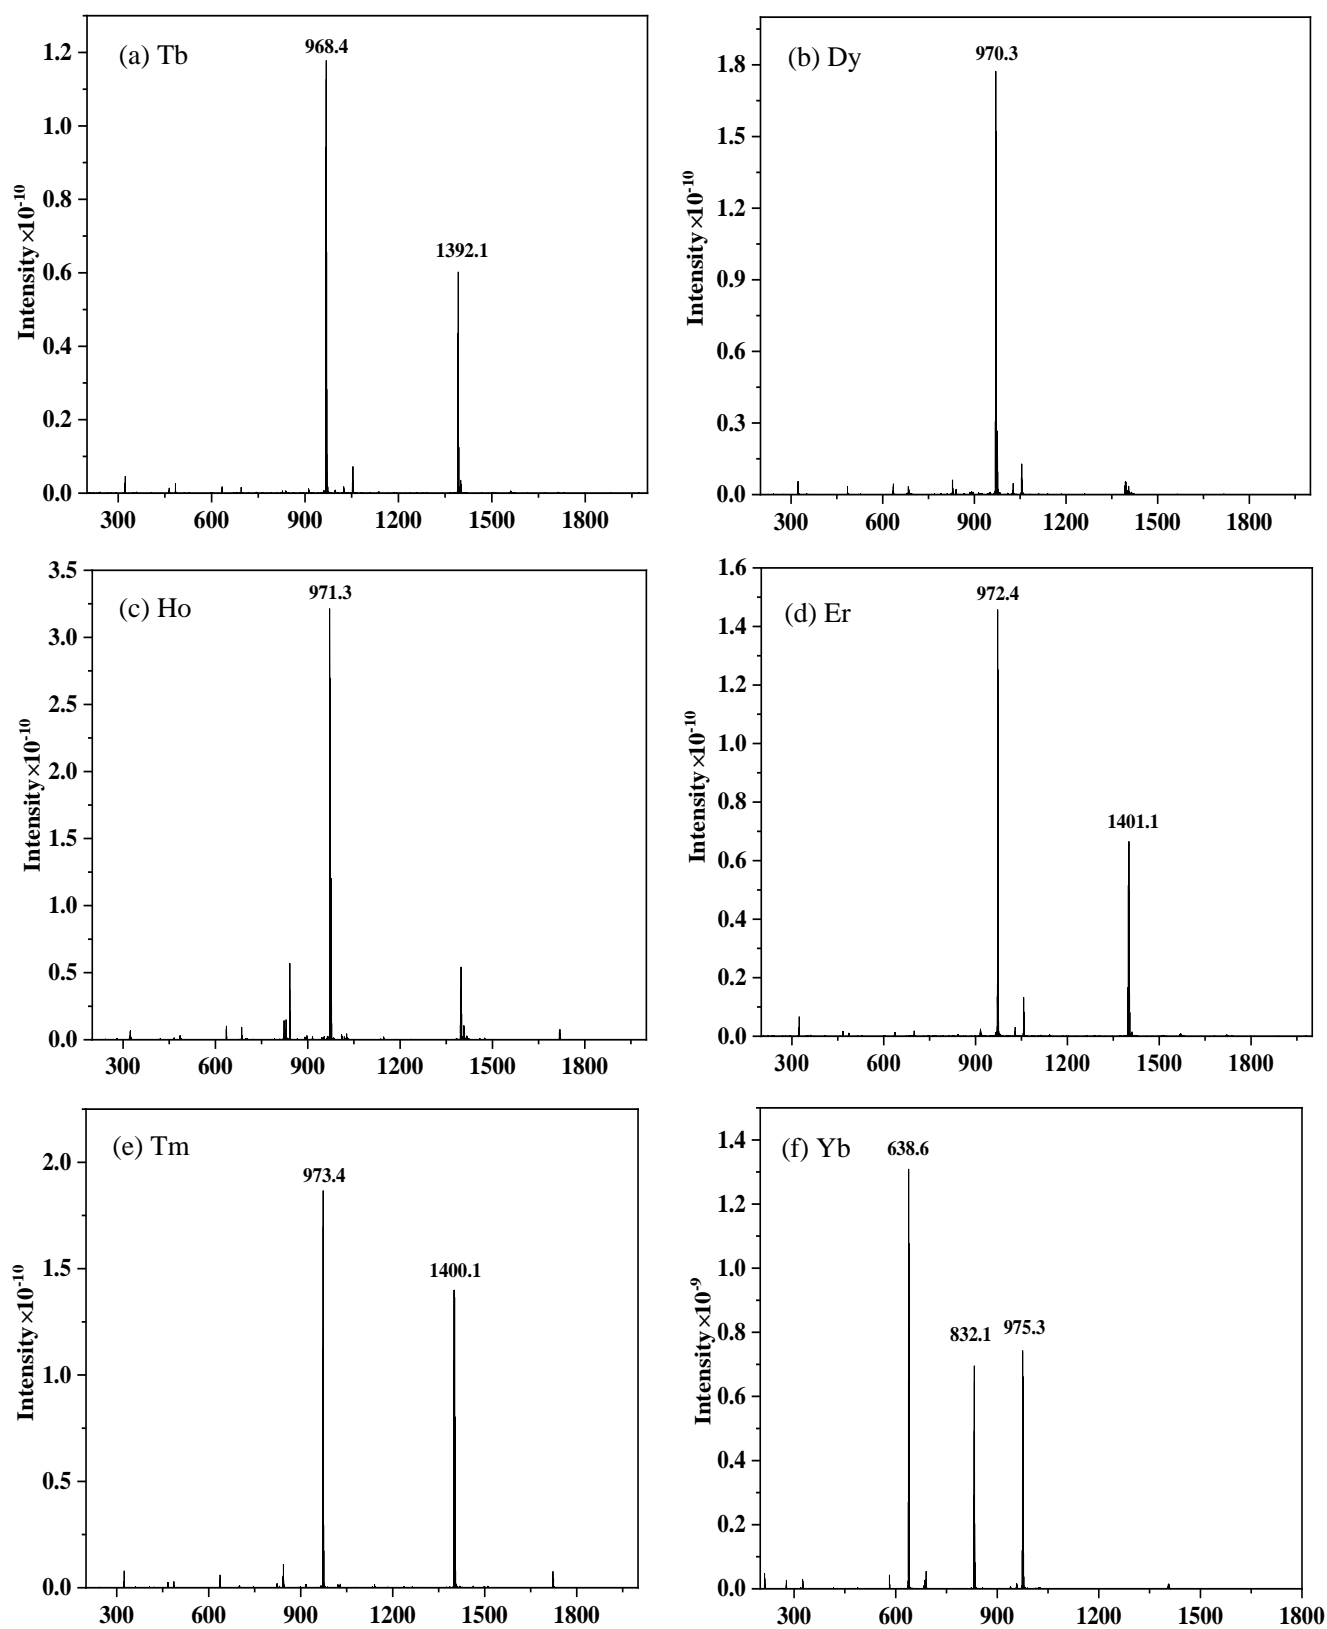

**Figure S1.** Positive mode mass spectra of Ln(TODGA)<sub>3</sub>Cl<sub>3</sub> (Ln = Tb, Dy, Ho, Er, Tm, Yb).

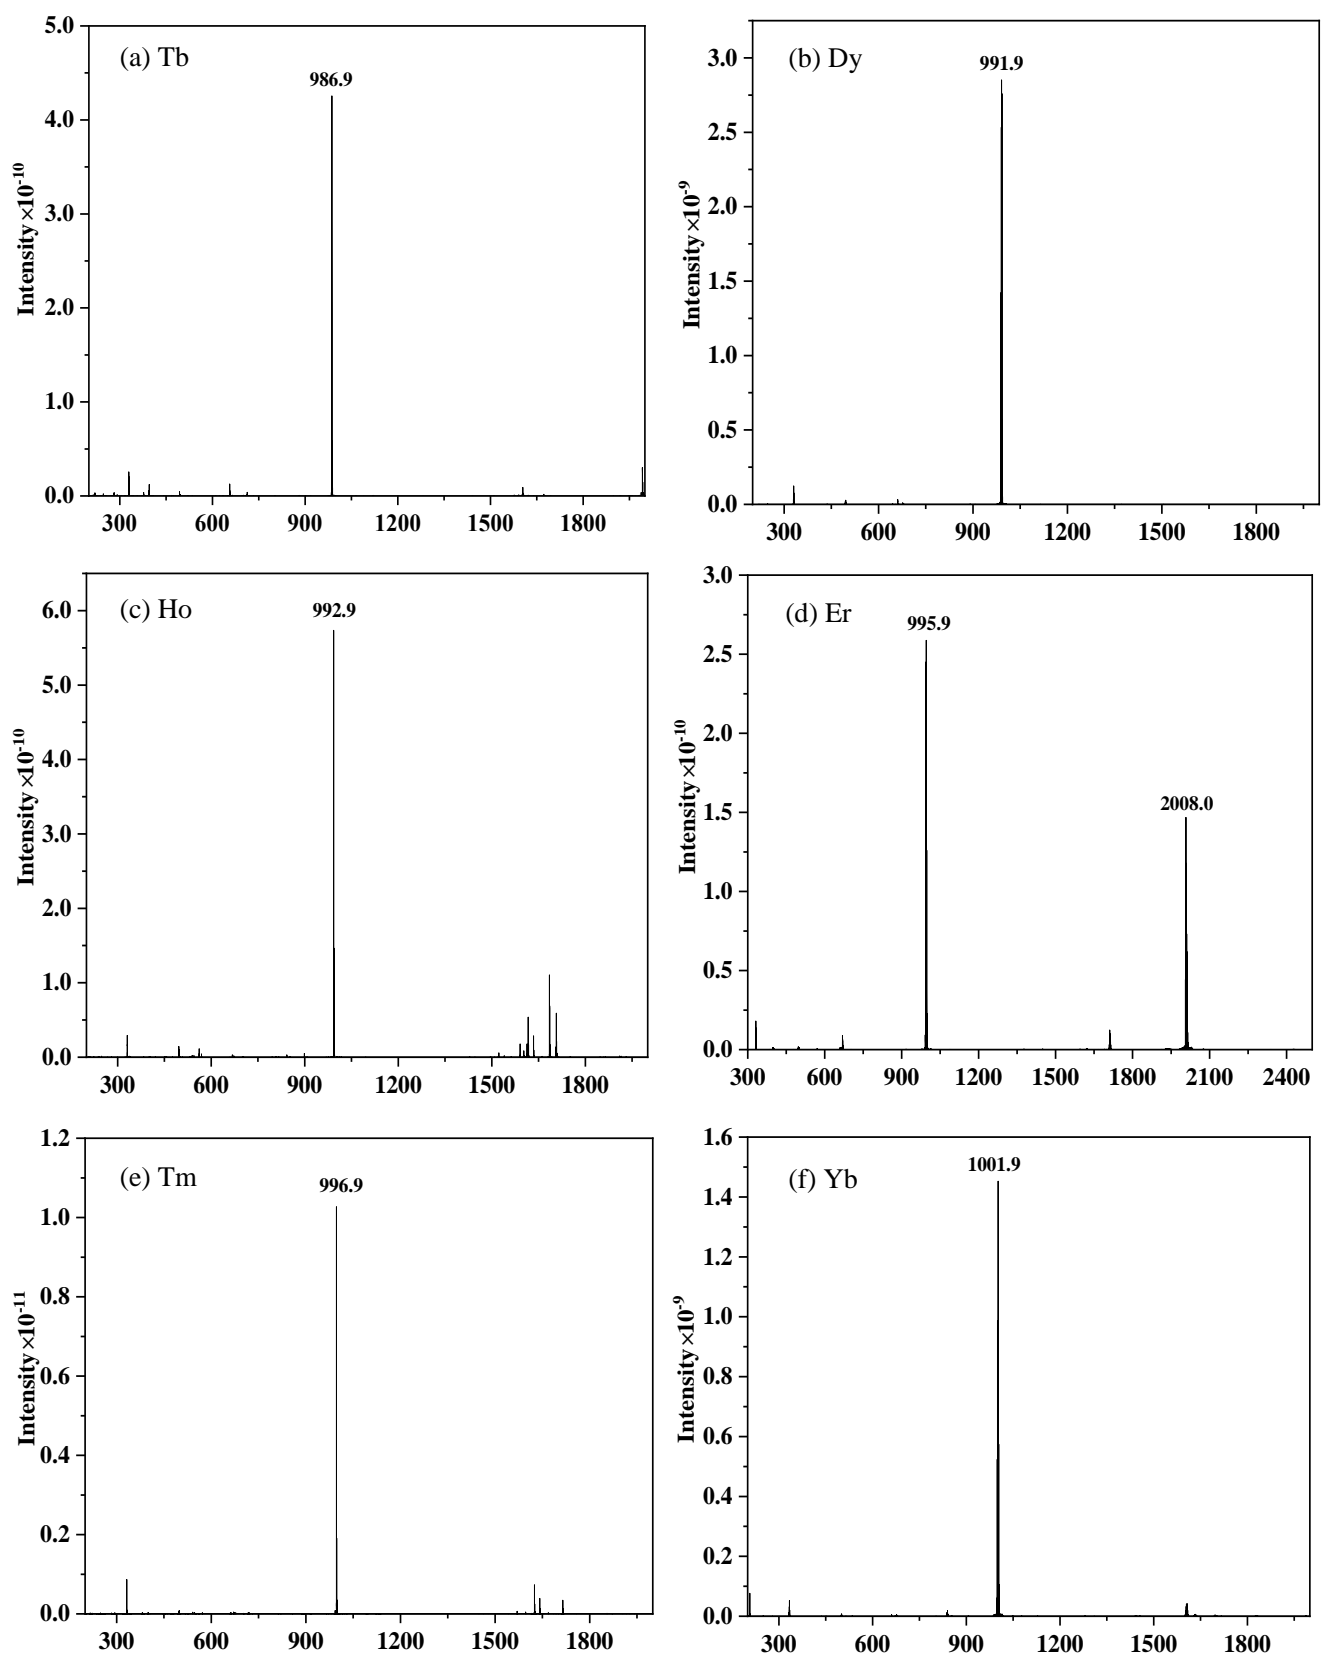

**Figure S2.** Negative mode mass spectra of  $\text{NH}_4[\text{Ln}(\text{hfa})_4]$  ( $\text{Ln} = \text{Tb, Dy, Ho, Er, Tm, Yb}$ ).

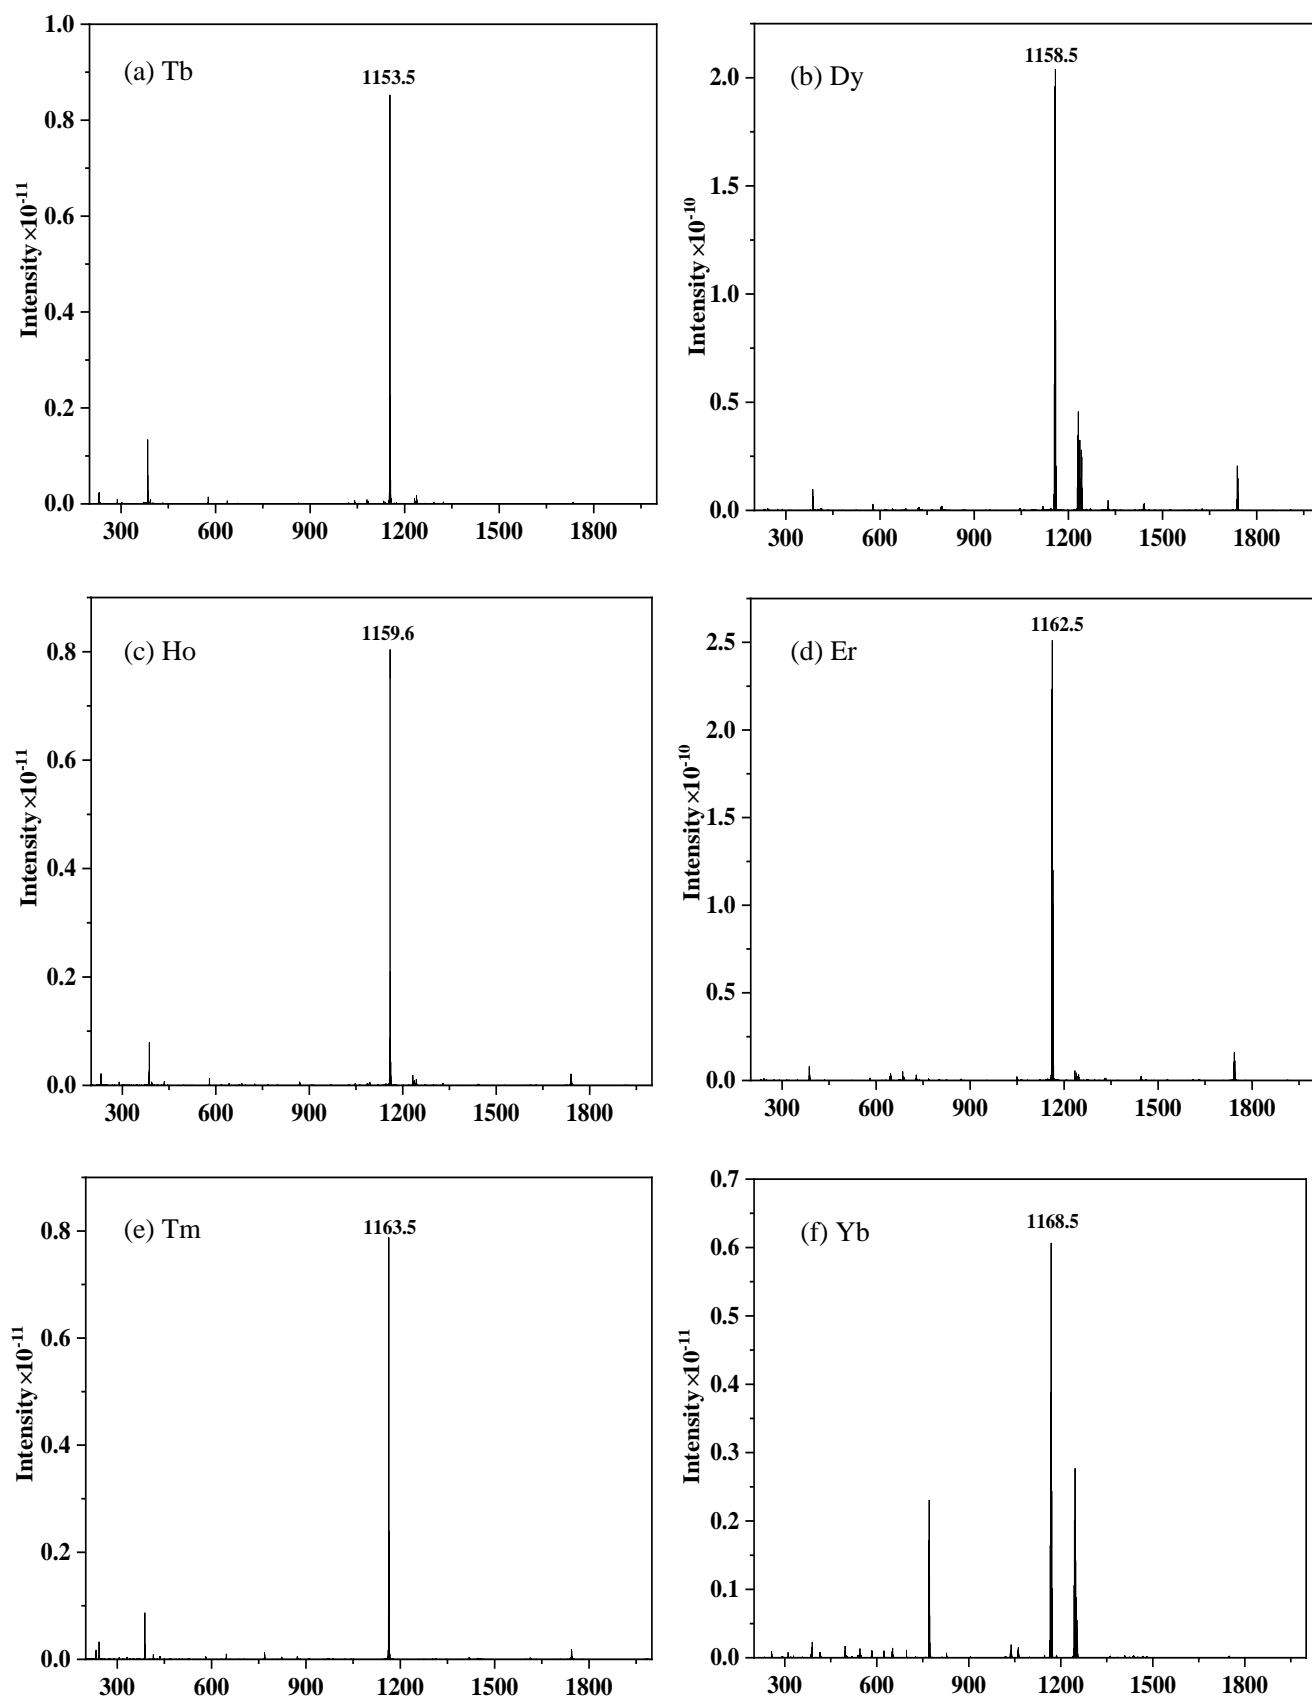

**Figure S3.** Positive mode mass spectra of  $[\text{Ln}(\text{TODGA})_3][\text{Ln}(\text{hfa})_4]_3$  (Ln = Tb, Dy, Ho, Er, Tm, Yb).

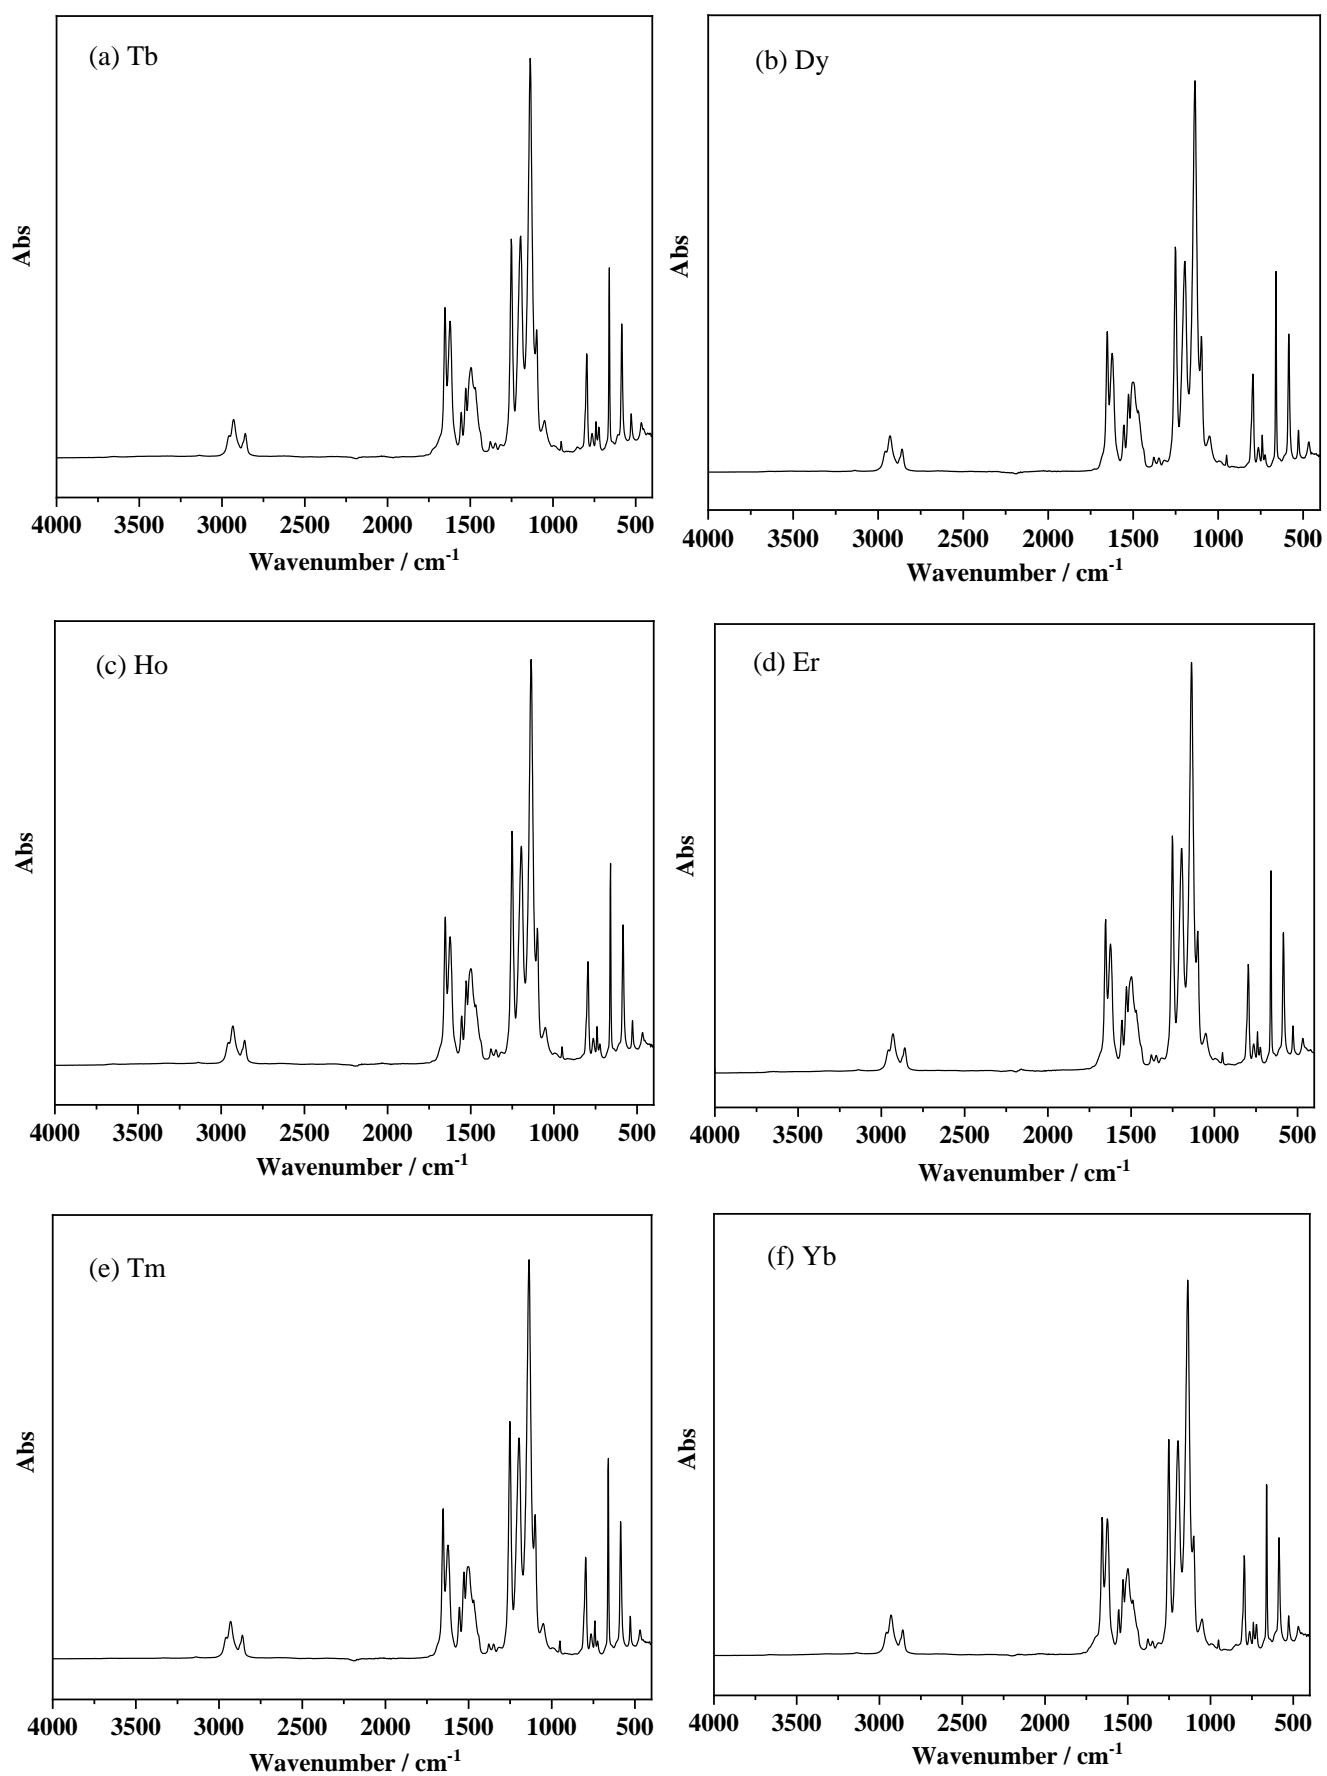

**Figure S4.** IR spectra of [Ln(TODGA)<sub>3</sub>][Ln(hfa)<sub>4</sub>]<sub>3</sub> (Ln = Tb, Dy, Ho, Er, Tm, Yb).

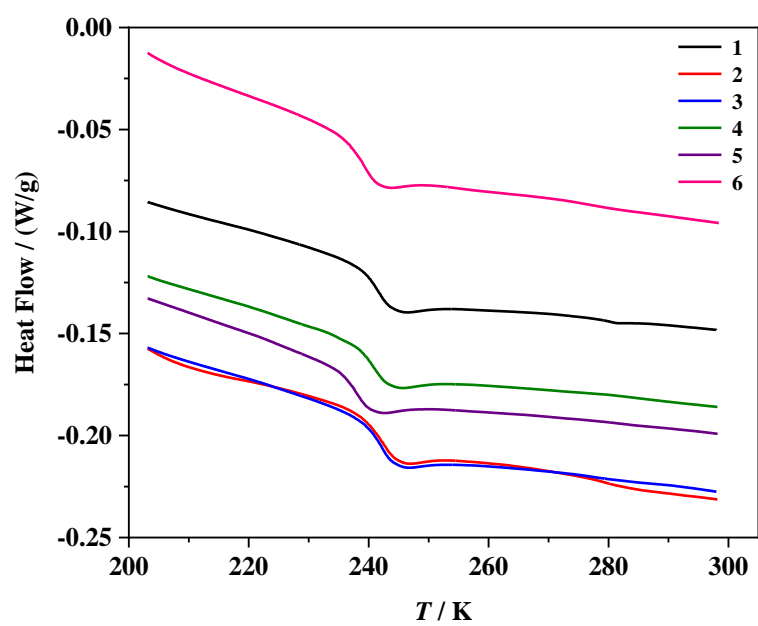

**Figure S5.** DSC curves of [Ln(TODGA)<sub>3</sub>][Ln(hfa)<sub>4</sub>]<sub>3</sub>. (1) Tb, (2) Dy, (3) Ho, (4) Er, (5) Tm and (6) Yb.



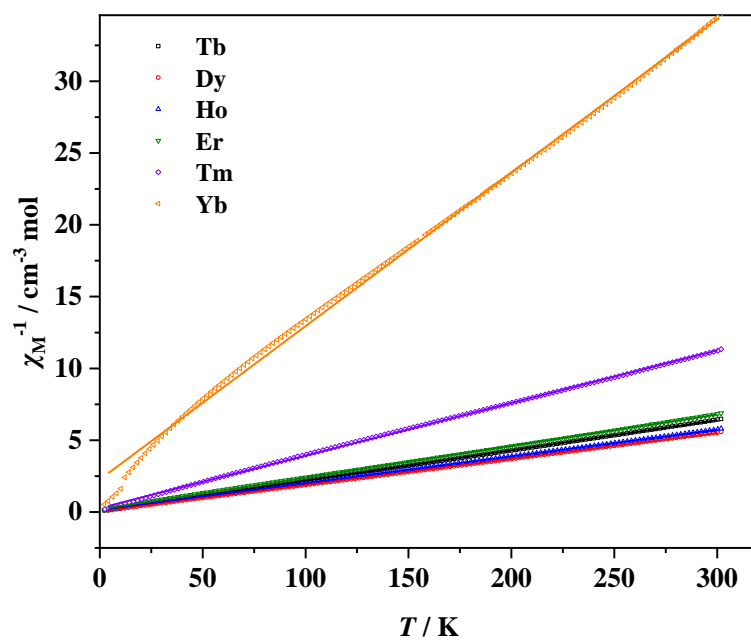

**Figure S6.** Temperature dependence of  $1/\chi_M$  measured under 10000 Oe for MILs **1-6**.

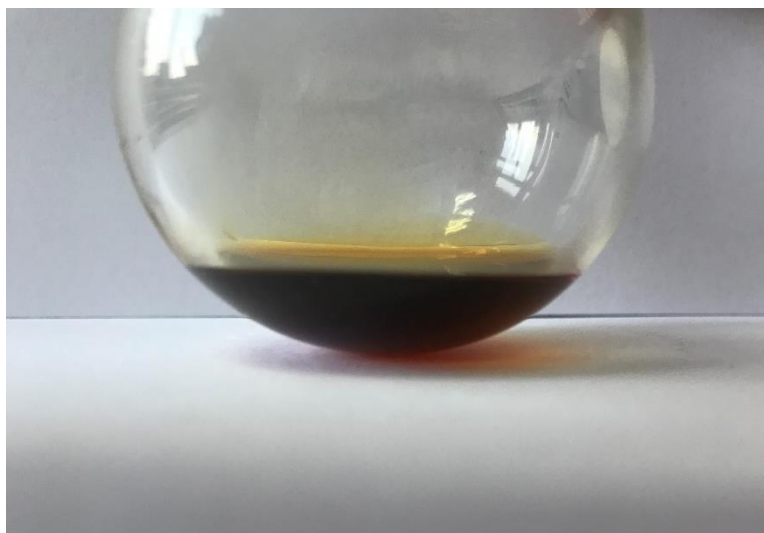

**Figure S7.** The photograph of MIL 1.

**Table S1.** Element analyses of MILs **1-6**.

| MIL | C / % (calcd / found) | H / % (calcd / found) | N / % (calcd / found) |
|-----|-----------------------|-----------------------|-----------------------|
| Tb  | 41.49 / 41.22         | 4.73 / 4.63           | 1.73 / 1.71           |
| Dy  | 41.37 / 41.34         | 4.71 / 4.76           | 1.72 / 1.62           |
| Ho  | 41.29 / 41.44         | 4.70 / 4.76           | 1.72 / 1.77           |
| Er  | 41.21 / 40.95         | 4.69 / 4.57           | 1.72 / 1.58           |
| Tm  | 41.15 / 40.98         | 4.69 / 4.60           | 1.71 / 1.63           |
| Yb  | 41.01 / 40.74         | 4.67 / 4.65           | 1.71 / 1.71           |
